# Supplementary material for: Authors and editors assort on gender and geography in high-rank ecological publications
Source: PLoS One. 2018 Feb 8;13(2):e0192481. doi: 10.1371/journal.pone.0192481 (PMC5805316; doi:10.1371/journal.pone.0192481)
Supplement: S4 Data file — (CSV) [file pone.0192481.s005.csv]

Editor Institution	ShanghaiRank2016	Editor City	Editor State	Editor Country	Editor Continent	WGS84Lat	WGS84Long
Aarhus University	76-100	Aarhus		Denmark	Europe	56.166667	10.2
Academy of Sciences of the Czech Republic		Prague		Czech Republic	Europe	50.081389	14.414167
Academy Sinica		Taipei		Taiwan	Asia	25.053315	121.607409
Acadia University		Wolfville	Nova Scotia	Canada	North America	45.091125	-64.361428
Adam Mickiewicz University		Poznan		Poland	Europe	52.407778	16.915556
Agency for Science Technology and Research				China	Asia
AgroParisTech		Paris		France	Europe	48.839722	2.348333
Agroscope Reckenholz-Tanikon Research Station		Zurich		Switzerland	Europe	47.366667	8.55
Aix Marseille University	76-100	Aix-en-Provence		France	Europe	43.293522	5.357917
Alaska Fisheries Science Center		Seattle	Washington	United States	North America	47.609722	-122.333056
Albert Einstein College of Medicine		Bronx	New York	United States	North America	40.850852	-73.844949
Albert Ludwigs University of Freiburg		Freiburg im Breisgau		Germany	Europe	47.994167	7.846944
Alfred Wegener Institute		Bremerhaven		Germany	Europe	53.55	8.583333
Allan Wilson Centre for Molecular Ecology and Evolution Massey University		Palmerston North		New Zealand	Oceania	-40.3848	175.6166
American Museum of Natural History		New York City	New York	United States	North America	40.780556	-73.974722
Anglia Ruskin University		Cambridge		United Kingdom	Europe	52.203083	0.133694
Appalachian State University		Boone	North Carolina	United States	North America	36.213843	-81.678621
Appalacian State University		Boone	North Carolina	United States	North America	36.213843	-81.678621
ARAID Institute Pirenaico		Zaragoza		Spain	Europe	41.65	-0.883333
Argicultural Research Organization Volcani Center				Israel	Asia	31.990278	34.817456
Arizona State University	151-200	Phoenix	Arizona	United States	North America	33.417195	-111.936511
Arizona State University and University of California San Francisco	151-200	Phoenix	Arizona	United States	North America	33.417195	-111.936511
Armstrong State University		Savannah	Georgia	United States	North America	31.979	-81.16
ARS USDA Bethesda		Bethesda	Maryland	United States	North America	38.984722	-77.113056
ARS USDA Fort Collins		Fort Collins	Colorado	United States	North America	40.559167	-105.078056
Arthur Rylah Institute for Environmental Research		Heidelberg	Victoria	Australia	Australia	-37.752	145.07
Auburn University		Auburn	Alabama	United States	North America	32.603374	-85.486078
Auckland University of Technology		Auckland		New Zealand	Oceania	-36.8533	174.7667
Austral University of Chile		Coihaique	Aisen	Chile	South America	-39.8073	-73.2511
Austral University of Chile		Coihaique	Aisen	Chile	South America	-39.8073	-73.2511
Australian Institute of Marine Science		Townsville	Queensland	Australia	Australia	-19.256389	146.818333
Australian Museum		Sydney	New South Wales	Australia	Australia	-33.877432	151.212732
Australian National University	51-75	Canberra		Australia	Australia	-35.3075	149.124417
Austrian Academy of Sciences				Austria	Europe	48.20872	16.37739
Autonomous University of Barcelona	101-150	Barcelona		Spain	Europe	41.500278	2.107778
Babraham Institute		Cambridge		United Kingdom	Europe	52.1331	0.20329
Ball State University		Muncie	Indiana	United States	North America	40.198322	-85.408943
Bangor University		Bangor	North Wales	United Kingdom	Europe	53.2289	-4.1301
Barcelona Institute of Science and Technology		Barcelona		Spain	Europe	41.500278	2.107778
Bavarian Forest National Park				Germany	Europe	48.966667	13.383333
Baylor College of Medicine	51-75		Texas	United States	North America	29.7105	-95.3965
Baylor University	51-75		Texas	United States	North America	29.7105	-95.3965
Beijing Forestry University		Beijing		China	Asia	40.001389	116.345278
Beijing Normal University		Beijing		China	Asia	39.957222	116.3625
Ben Gurion University of the Negev				Israel	Asia	31.262192	34.801511
Ben-Gurion University of the Negev				Israel	Asia	31.262192	34.801511
Berlin Institute for Advanced Study		Grunewald		Germany	Europe	52.491389	13.276389
Beuth University of Applied Sciences		Berlin		Germany	Europe	52.544167	13.352778
Beuth University of Applied Sciences Berlin		Berlin		Germany	Europe	52.544167	13.352778
BGI Shenzhen		Shenzhen	Guangdong	China	Asia	22.55	114.1
Biodiversitat und Klima		Frankfurt am Main		Germany	Europe	50.116667	8.683333
Biodiversity and Climate Research Center		Senckenberg	Frankfurt	Germany	Europe	50.1175	8.651667
Senckenberg Biodiversity and Climate Research Center		Senckenberg	Frankfurt	Germany	Europe	50.1175	8.651667
Senckenberg Biodiversity and Climate Research Centre		Senckenberg	Frankfurt	Germany	Europe	50.1175	8.651667
Seckenberg Biodiversity and Climate Research Center		Senckenberg	Frankfurt	Germany	Europe	50.1175	8.651667
Biological Records Center
Biomath and Stat Scotland		Edinburgh	Scotland	United Kingdom	Europe	55.953056	-3.188889
Biometrics Research LLC Gainesville		Gainesville	Florida	United States	North America	29.651997	-82.324992
Biosciences Research Division Department of Primary Industries		Bundoora	Victoria	Australia	Australia	-37.695	145.064
Bodega Marine Laboratory				United States	North America	39.306944	-37.695,
Boston University	101-150			United States	North America	42.3496	-71.0997
Bournemouth University		Bournemouth University	England	United States	North America	50.743213	-1.896901
Brandeis University				United States	North America	42.365664	-71.259742
Brigham and Women's Hospital		Boston	MA	United States	North America	42.3261	-71.1493
Brigham and Womens Hospital		Boston	MA	United States	North America	42.3261	-71.1493
Brigham Young University		Provo	Utah	United States	North America	40.25	-111.65
British Antarctic Survey Cambridge		Cambridge	England	United States	North America	52.205	0.119
British Trust for Ornithology		Thetford	England	United States	North America	52.41	0.74
Brown University	101-150		RI	United States	North America	41.8262	-71.4032
Bruce Museum Greenwich		Greenwich	Connecticut	United States	North America	41.019	-73.6235
Bryn Mawr College		Bryn Mawr	Pennsylvania	United States	North America	40.026389	-75.313611
California Institute of Technology	40	Pasadena	CA	United States	North America	34.138	-118.125
California State University Fresno		Fresno	California	United States	North America	36.813333	-119.75
California State University Long Beach		Long Beach	California	United States	North America	33.783022	-118.112858
California state University Long Beach		Long Beach	California	United States	North America	33.783022	-118.112858
California State University Los Angeles		Los Angeles	California	United States	North America	34.066667	-118.167778
California State University Sacramento		Sacramento	California	United States	North America	38.560222	-121.424111
California state University Sacramento		Sacramento	California	United States	North America	38.560222	-121.424111
Canadian Forest Service Victoria		Victoria	British Columbia	Canada	North America	48.422	-123.365
Cardiff University	51-75	Cardiff	Wales	United Kingdom	Europe	51.4877	-3.179
Carl von Ossietzky University		Oldenburg		Germany	Europe	53.147778	8.182222
Carleton University		Ottawa	Ontario	Canada	North America	45.3831	-75.6976
Cary Institute of Ecosystem Studies		Millbrook	NY	United States	North America	41.784722	-73.687778
Cary Insitute of Ecosystem Studies		Millbrook	NY	United States	North America	41.784722	-73.687778
Case Western Reserve University	151-200	Cleveland	OH	United States	North America	41.50416	-81.60845
Case Western Reserve University School of Medicine	151-200	Cleveland	OH	United States	North America	41.50416	-81.60845
CATIE		Turrialba		Costa Rica	North America	9.9	-83.683333
Cawthron Institute		Nelson		New Zealand	Oceania	-41.270833	173.283889
CEH		Wallingford		United Kingdom	Europe	51.599	-1.125
Center for Advanced Studies Blanes		Girona		Spain	Europe	41.984444	2.821111
Center for Ecology and Hydrology		Wallingford		United Kingdom	Europe	51.599	-1.125
Center for Estudios Avanzados		Mexico City		Mexico	North America	19.509167	-99.129444
Center for Integrative Bioinformatics		Vienna		Austria	Europe	48.2	16.366667
Center for Investment Principe Felipe		Valencia		Spain	Europe	39.466667	-0.375
Centre d'Ecologie fonctionnelle et Evolutive		Montpellier		France	Europe	43.633	3.87
Centre for Cancer Biology		Adelaide	South Australia	Australia	Australia	-34.924836	138.595653
Centre for Ecology and Hydrology		Wallingford		United Kingdom	Europe	51.599	-1.125
Centro de Biologia Molecular Severo Ochoa				Spain	Europe	40.55007	-3.690513
Centro de Estudios Avanzados de Blanes		Girona		Spain	Europe	41.984444	2.821111
Chang Gung University		Taoyuan City		Taiwan	Asia	24.995006	121.338094
Chapman University		Orange	California	United States	North America	33.792778	-117.851389
Charité - Universitätsmedizin Berlin		Berlin		Germany	Europe	52.526667	13.379722
Charite-Universitatsmedizin		Berlin		Germany	Europe	52.526667	13.379722
Charles Darwin University		Darwin		Australia	Australia	-12.373056	130.883611
Charles University		Prague		Czech Republic	Europe	50.0884	14.4037
Childrens Hospital of Philadelphia		Philadelphia	Pennsylvania	United States	North America	39.948	-75.194
China Agricultural University	101-150	Beijing		China	Asia	40.0025	116.352778
Chinese Academy of Sciences		Beijing		China	Asia	39.916667	116.383333
CIB		Medellin		Colombia	South America	6.230833	-75.590556
CIBIO		Vairao		Portugal	Europe	-17.819167	-149.292222
CIEP		Coihaique	Aisen	Chile	South America	-45.566667	-72.066667
Cincinnati Children's Hospital Medical Center		Cincinnati	OH	United States	North America	39.1	-84.516667
CINVESTAV		Mexico City		Mexico	North America	19.509167	-99.129444
CINVESTAV Irapuato		Guanajuato		Mexico	North America	19.509167	-99.129444
CINVESTAV-Irapuato		Guanajuato		Mexico	North America	19.509167	-99.129444
Cirad UPR BSEF		Montpellier		France	Europe	43.6119	3.8772
Claude Bernard University		Lyon		France	Europe	45.78098	4.86759
Cleveland Clinic Genomic Medicine Institute		Cleveland	Ohio	United States	North America	41.482222	-81.669722
CNR Neurosciences Institute		Padua		Italy	Europe	45.416667	11.866667
CNRS		Montpellier		France	Europe	43.6119	3.8772
CNRS CEFE		Montpellier		France	Europe	43.6119	3.8772
CNRS Center for Ecological Function and Evolution		Montpellier		France	Europe	43.6119	3.8772
CNRS Ecotron		Montferrier Sur-Lez		France	Europe	43.6119	3.8772
CNRS Montepellier		Montpellier		France	Europe	43.6119	3.8772
CNRS Moulis		Moulis		France	Europe	42.9619	1.0917
CNRS Station Ecology Experimental		Moulis		France	Europe	42.9619	1.0917
Colgate University		Hamilton Village	New York	United States	North America	42.819444	-75.536389
College de France		Paris		France	Europe	48.849167	2.345556
College of Charleston		Charleston	South Carolina	United States	North America	32.784167	-79.938056
College of William and Mary		Williamsburg	Virginia	United States	North America	37.271059	-76.707485
Colorado Department of Parks and Wildlife		Denver	Colorado	United States	North America	39.76185	-104.881105
Colorado State University		Fort Collins	CO	United States	North America	40.574836	-105.080978
Columbia University	13	New York City	NY	United States	North America	40.8075	-73.961944
Columbia University Medical Center	13	New York City	NY	United States	North America	40.8075	-73.961944
Concordia University		Montreal	Quebec	Canada	North America	45.497	-73.578
Concordia University Montreal		Montreal	Quebec	Canada	North America	45.497	-73.578
Consejo National Investment Center Buenos Aires		Buenos Aires		Argentina	South America	-34.603333	-58.381667
Consejo National Investment Center Mendoza		Mendoza		Argentina	South America	-32.883333	-68.816667
Consejo National Investment Center San Miguel de Tucuman		San Miguel De Tucuman		Argentina	South America	-26.816667	-65.216667
Consejo Superior de investigaciones cientificas		Madrid		Spain	Europe	40.383333	-3.716667
Cornell University	17	Ithaca	NY	United States	North America	42.45	-76.48
CSIC Consejo Superior de investigaciones cientificas		Madrid		Spain	Europe	40.383333	-3.716667
CSIRO
CSIRO
CSIRO
CSIRO
CSIRO Plant Industry		Canberra		Australia	Australia	-35.3075	149.124417
CUNY		New York City	New York	United States	North America	40.73	-73.997
CUNY City College		New York City	New York	United States	North America	40.8194	-73.95
Curtin University		Bentley	Perth	Australia	Australia	-32.00469	115.89405
Czech University of Life Sciences		Prague		Czech Republic	Europe	50.135889	14.370778
Czech University of Life Sciences Prague		Prague		Czech Republic	Europe	50.135889	14.370778
Dalhousie University		Halifax	Nova Scotia	Canada	North America	44.636944	-63.591667
Dana Farber Cancer Institute		Boston	MA	United States	North America	42.337992	-71.107164
Dartmouth College		Hanover	NH	United States	North America	43.703333	-72.288333
Deakin University		Geelong		Australia	Australia	-38.1979	144.2973
DIBIT		Milano		Italy	Europe	45.466667	9.183333
Drexel University		Philadelphia	Pennsylvania	United States	North America	39.954	-75.188
Dublin City University		Dublin		Ireland	Europe	53.384954	-6.256542
Duke University	31	Durham	NC	United States	North America	36.001111	-78.938889
Duke University Medical Center	31	Durham	NC	United States	North America	36.001111	-78.938889
Duke-NUS Medical School Singapore		Singapore		Singapore	Asia	1.3	103.8
Earlham College		Richmond	Indiana	United States	North America	39.824567	-84.913272
Eawag Swiss Federal Institute of Aquatic Sciences & Technology		Dubendorf		Switzerland	Europe	47.416667	8.616667
Ecole normale Superieure		Paris		France	Europe	48.8567	2.3508
Ecole Normale Superieur		Paris		France	Europe	48.8567	2.3508
Ecole Polytechnic Federale Lausanne		Lausanne		France	Europe	46.520278	6.565556
Emory University	51-75	Atlanta	GA	United States	North America	33.791111	-84.323333
Emory University School of Medicine	51-75	Atlanta	GA	United States	North America	33.791111	-84.323333
Emory University School of Medicine	51-75	Atlanta	GA	United States	North America	33.791111	-84.323333
Erasmus University		Rotterdam		Netherlands	Europe	51.918056	4.525833
Ernst Moritz Arndt University		Greifswald		Germany	Europe	54.094639	13.374625
Estacion Biologica de donana		Huelva		Spain	Europe	37.25	-6.95
Estacion Biologica de Donana		Huelva		Spain	Europe	37.25	-6.95
Estation Biological Donana		Huelva		Spain	Europe	37.25	-6.95
Estonia University of Life Sciences		Tartu		Estonia	Europe	58.388056	26.697222
ETH Zurich		Zurich		Switzerland	Europe	47.376389	8.548056
European Molecular Biology Laboratory		Heidelberg		Germany	Europe	49.384622	8.710142
Europoean Bioinformatics Institute		Hinxton		United Kingdom	Europe	52.079933	0.186736
Ewha Womans University		Seoul		Korea	Asia	37.561867	126.946833
Ewha Womens University		Seoul		Korea	Asia	37.561867	126.946833
Federal University of Rio de Janeiro		Rio de Janeiro		Brazil	South America	-22.908333	-43.196389
Field Museum		Chicago	Illinois	United States	North America	41.836944	-87.684722
Finnish Environment Institute		Helsinki		Finland	Europe	60.178333	24.915
Fish and Wildlife Research Institute		Tallahassee	Florida	United States	North America	30.455	-84.253333
Fisheries and Oceans Canada Gulf Fisheries Center		Moncton	New Brunswick	Canada	North America	46.132778	-64.771389
Fisheries and Oceans Canada Pacific Biological Station		Nanaimo	British Columbia	Canada	North America	49.164167	-123.936389
Flinders University of South Australia		Bedford Park	South Australia	Australia	Australia	-35.021	138.568
Florida Atlantic University		Boca Raton	Florida	United States	North America	26.3712	-80.10166
Florida Institute of Technology		Melbourne	FL	United States	North America	28.065772	-80.624483
Florida International University		University Park	Florida	United States	North America	25.75744	-80.373282
Florida State University		Tallahassee	FL	United States	North America	30.442	-84.298
Foundation Edmund Mach		Trentino		Italy	Europe	46.445556	11.173056
Francis Crick Institute		London		United Kingdom	Europe	51.5315	-0.1289
Franklin and Marshall University		Lancaster	PA	United States	North America	40.046944	-76.320556
Franklin and Marshall College		Lancaster	PA	United States	North America	40.046944	-76.320556
Fred Hutchinson Cancer Research Center		Seattle	WA	United States	North America	47.609722	-122.333056
Freie University of Berlin		Berlin		Germany	Europe	52.453056	13.290556
Free University of Berlin		Berlin		Germany	Europe	52.453056	13.290556
French Institute for Agricultural Research		Valbonne		France	Europe	43.622222	7.05
Friedrich Miescher Institute for Biomedical Research and University of Basel		Basel		Switzerland	Europe	47.566667	7.6
Friedrich Schiller University of Jena		Jena	Thuringia	Germany	Europe	50.928333	11.582222
Fudan University		Shanghai		China	Asia	31.298889	121.499167
Geisel School of Medicine Dartmouth		Hanover	NH	United States	North America	43.703333	-72.288333
Genentech South San Francisco		San Francisco	California	United States	North America	37.783333	-122.416667
Genome Institute of Singapore		Biopolis		Singapore	Asia	1.3025	103.791667
George Washington University		Washington DC		United States	North America	38.9007	-77.0508
Georgetown University		Washington DC		United States	North America	38.907222	-77.072778
Georgia Institute of Technology		Atlanta	GA	United States	North America	33.775833	-84.394722
Georgia Southern University		Statesboro	Georgia	United States	North America	32.419448	-81.776698
German Cancer Research Center		Heidelberg		Germany	Europe	49.414	8.672
Gladstone Institute of Cardiovascular Disease		San Francisco	California	United States	North America	37.783333	-122.416667
Goethe Universitat Frankfurt am Main	151-200	Frankfurt		Germany	Europe	50.127778	8.666667
Goethe University		Frankfurt		Germany	Europe	50.127778	8.666667
Graduate University of Advanced Studies		Hayama		Japan	Asia	35.2611	139.6084
Graz University		Graz		Austria	Europe	47.078056	15.449167
Gregor Mendel Institute of Molecular Plant Biology		Vienna		Austria	Europe	48.2	16.366667
Griffith University		Brisbane		Australia	Australia	-27.5526	153.0539
Gwangju Institute of Science and Technology		Gwangju		South Korea	Asia	35.2265	126.84
Hangzhou Normal University		Hangshou		China	Asia	30.25	120.166667
Harper Adams University		Edgmond	Shropshire	United Kingdom	Europe	52.779651	-2.427517
Harvard Forest		Petersham	MA	United States	North America	42.531325	-72.189789
Harvard Medical School		Boston	MA	United States	North America	42.335743	-71.105138
Harvard University	1	Cambridge	MA	United States	North America	42.374444	-71.116944
Hebrew University of Jerusalem		Jerusalem		Israel	Asia	31.775833	35.2
Hedmark University College		Hedmark		Norway	Europe	60.8857	11.558
Heidelberg University	51-75	Heidelberg		Germany	Europe	49.410278	8.706389
Helmholtz Center for infection Research		Braunschweig		Germany	Europe	52.266667	10.516667
Helmholtz Zentrum Munchen		Neuherberg		Germany	Europe	48.2225	11.593333
Helmholz Center for Environmental Research		Leipzig		Germany	Europe	51.333333	12.383333
Henan University of Science and Technology		Luoyang	Henan	China	Asia	34.669722	112.442222
Heriot-Watt University		Edinburgh		Scotland	Europe	55.953056	-3.188889
Highland Statistics Ltd		Newburgh		United Kingdom	Europe	57.31557	-2.00164
Hiroshima University		Higashi-Hiroshima		Japan	Asia	34.382222	132.458056
Hobart and William Smith colleges		Geneva	New York	United States	North America	42.857123	-76.985407
Hokkaido University		Sapporo		Japan	Asia	43.066667	141.35
Howard Hughes Medical Institute		Chevy Chase	MD	United States	North America	38.989167	-77.076111
Huazhong Agricultural University		Wuhan		China	Asia	30.583333	114.283333
Huashong Agricultural University		Wuhan		China	Asia	30.583333	114.283333
Hudson State University
HudsonAlpha Institute of Biotechnology		Huntsville	Alabama	United States	North America	34.73	-86.585
Humboldt University of Berlin		Berlin		Germany	Europe	52.518056	13.393333
Humboldt University		Berlin		Germany	Europe	52.518056	13.393333
Iceland Heart Association		Kópavogur		Iceland	Europe	64.112222	-21.913333
Idaho State University		Pocatello	Idaho	United States	North America	42.861	-112.434
IGBMC Strasbourg		Strasbourg		France	Europe	48.5257	7.741456
Ilia State University		Tbilisi		Georgia	Europe	41.716667	44.783333
Illinois State University		Normal	Illinois	United States	North America	40.512222	-88.988611
Imperial College London	33	London	England	United Kingdom	Europe	51.498356	-0.176894
Indian Institute of Science		Bangalore		India	Asia	13.01978	77.56605
Indiana University	101-150	Bloomington	IN	United States	North America	39.166667	-86.5
INRA French Institute for Agricultural Research		Valbonne		France	Europe	43.622222	7.05
INRA French National Institute for Agricultural Research		Valbonne		France	Europe	43.622222	7.05
INRA Nancy		Nancy		France	Europe	48.6936	6.1846
Institut de Biologia Evolutiva		Barcelona		Spain	Europe	41.383333	2.183333
Institut de Biologie Physico-Chimique		Paris		France	Europe	48.856578	2.351828
Institut de Recherche pour le developpement		Marseille		France	Europe	43.2964	5.37
Institut Jean-Pierre Bourgin
Institut Pasteur		Paris		France	Europe	48.84	2.311667
Institute Curie		Paris		France	Europe	48.84	2.311667
Institute for Avian Research		Wilhelmshaven		Germany	Europe	53.516667	8.133333
Institute for Bioscience and Biotechnology Research		College Park	Maryland	United States	North America	38.9875	-76.94
Institute for Plant Genetics and Crop Plant Research Germany		Leibzin		Germany	Europe	51.333333	12.383333
Institute Gulbenkian Ciencias		Oeiras		Portugal	Europe	38.683333	-9.316667
Institute Nacional Pesquisas Amazonia		Manaus		Brazil	South America	-3.09577	-59.98975
Institute of Avian Research
Institute of Biochemistry				Hungary	Europe
Institute of Biochemistry Synthetic and Systematic Biology Hungary				Hungary	Europe
Institute of Butantan		Sao Paulo		Brazil	South America	-23.533333	-46.633333
Institute of Ecology and Evolution Bern		Bern		Switzerland	Europe	46.95	7.45
Institute of Ecosystem Studies
Institute of Evolutionary Sciences of Montpellier		Montpellier		France	Europe	43.631944	3.863889
Institute of Forest Ecosystem Research
Institute of Molecular and Cell Biology Singapore
Institute Pasteur		Paris		France	Europe	48.84	2.311667
Institute Pierre & Simon Laplace		Paris		France	Europe
Instituto Alexander von Humboldt
Instituto de Biomedicina de Sevilla
Instituto de Investigaciones Marinas
Instituto de Recursos Naturales
Instituto de Recursos Naturales y Agrobiologia Sevilla
Instituto Florestal do Estado de Sao Paulo
Instituto Pirenaico de Ecologia
Instituto Potosino de Investigacion Cientifica y Tecnologica
Iowa State University		Ames	IA	United States	North America	42.023949	-93.647595
IRD		Marseille		France	Europe	43.2964	5.37
IRNAS-CSIC		Sevilla		Spain	Europe	37.377222	-5.986944
IST Austria				Austria	Europe
J Craig Venter Institute
Jackson Lab		Bar Harbor
Jackson Lab
Jagiellonian University		Krakow		Poland	Europe	50.060833	19.932778
James Cook University	101-150	Cairns		Australia	Australia	-19.327778	146.758333
James Hutton Institute		Dundee	Scotland	United Kingdom	Europe	56.462	-2.9707
Japan Agency of Marine Earth Science and Technology				Japan	Asia
Jet Propulsion Lab				United States	North America
Johannes Gutenberg University Mainz		Mainz	Rhineland	Germany	Europe	49.993056	8.241667
Johannes Gutenberg University Main		Mainz	Rhineland	Germany	Europe	49.993056	8.241667
John Innes Centre Norwich		Norwich	Norfolk	United Kingdom	Europe	52.6	1.3
Johns Hopkins University	12	Baltimore	MD	United States	North America	39.298889	-76.594167
Johns Hopkins University School of Medicine		Baltimore	MD	United States	North America	39.298889	-76.594167
Joseph W Jones Ecological Research Center
Jules Verne University Picardie		Amiens		France	Europe	49.8768	2.2646
Julius Maximilian University of Wurzburg		Wuzburg		Germany	Europe	49.788056	9.935278
Kagawa University		Takamatsu	Kagawa	Japan	Asia	34.342972	134.037639
Kansas State University		Manhattan	KS	United States	North America	39.191667	-96.580833
Karlsruhe Institute of Technology		Karlsruhe	Baden-Wurttemberg	Germany	Europe	49.009444	8.411667
Karolinska Institutet	34	Stockholm		Sweden	Europe	59.348889	18.026667
Katholieke Universiteit Leuven		Leuven	Flanders	Belgium	Europe	50.878	4.7
Katholieke University Leuven	101-150	Leuven	Flanders	Belgium	Europe	50.878	4.7
KU Leuwen	101-150	Leuven	Flanders	Belgium	Europe	50.878	4.7
Keele University		Newcastle-under-Lyme	England	United Kingdom	Europe	53.003	-2.273
Kent State University		Kent	OH	United States	North America	41.146411	-81.341744
Kenyon College		Gambier	Ohio	United States	North America	40.376389	-82.395833
King Abdullah University		Thuwal		Saudi Arabia	Asia	22.312602	39.11047
Kings College	45
Kings Park and Botanic Gardens		Perth		Australia	Australia	-31.96	115.83
Koblenz University of Applied Sciences		Koblenz		Germany	Europe	50.359722	7.597778
Koblenz University of Applied Science		Koblenz		Germany	Europe	50.359722	7.597778
Kogakuin University		Shinjuku	Tokyo	Japan	Asia	35.690569	139.695402
Korea University		Seongbuk-gu	Seoul	South Korea	Asia	37.589167	127.032222
KTH Royal Institute of Technology
KU Leuven	51-75	Leuven	Flanders	Belgium	Europe	50.878	4.7
KU Leuven	51-75	Leuven	Flanders	Belgium	Europe	50.878	4.7
Kunming Institute of Zoology		Kunming	Yunnan	China	Asia	25.066667	102.683333
Kyoto University	21	Kyoto		Japan	Asia	35.026212	135.780842
Kyushu University		Fukuoko		Japan	Asia	33.62784	130.42297
La Trobe University	151-200	Bundoora	Melbourne	Australia	Australia	-37.72179	145.047909
Laboratoire d'Ecologie Alpine		Gieres		France	Europe	45.1828	5.7925
Lakehead University		Thunder Bay	Ontario	Canada	North America	48.421389	-89.260556
Lakeland University		Howards Grove	Wisconsin	United States	North America	43.84213	-87.88372
Lancaster Environmental Center				United Kingdom	Europe
Lancaster University		Lancaster		United Kingdom	Europe	54.010278	-2.785556
Landcare Research		Lincoln		New Zealand	Oceania	-43.640709	172.475441
Landcare Research Lincoln University		Christchurch		New Zealand	Oceania	-43.640709	172.475441
Lawrence Livermore National Laboratory		Livermore	California	United States	North America	37.69	-121.71
Lehigh University		Bethlehem	Pennsylvania	United States	North America	40.607167	-75.379
Leibniz Institute of Freshwater Ecology		Berlin		Germany	Europe	52.516667	13.383333
Leibniz Institute of Freshwater Ecology and Inland Fisheries				Germany	Europe
Leibniz Institute of Neurobiology				Germany	Europe
Leibniz Institute of Zoology and Wildlife Research				Germany	Europe
Leiden University	151-200	Leiden		Netherlands	Europe	52.156071	4.486949
Lieber Institute of Brain Development
Lincoln University New Zealand		Christchurch	Lincoln	New Zealand	Oceania	-43.644444	172.468611
Landcare Research, Lincoln University		Christchurch	Lincoln	New Zealand	Oceania	-43.644444	172.468611
Linkoping University		Linkoping		Sweden	Europe	58.399167	15.576944
Linnaeus University		Vaxjo		Sweden	Europe	56.854167	14.830833
Linneaus University		Vaxjo		Sweden	Europe	56.854167	14.830833
LMU Munchen		Munich		Germany	Europe	48.150833	11.580278
Los Alamos National Laboratory		Los Alamos	NM	United States	North America	35.875556	-106.324167
Louisiana State University		Baton Rouge	LA	United States	North America	30.4145	-91.1783
Lowestoft Lab		Pakefield		United Kingdom	Europe	52.451	1.728
Lund University	76-100	Lund	Scandia	Sweden	Europe	55.705833	13.193333
Macquarie University	101-150	Sydney		Australia	Australia	-33.775259	151.112915
Marquette University		Milwaukee	Wisconsin	United States	North America	43.038	-87.928
Marshall University		Huntington	WV	United States	North America	38.42508	-82.42046
Masaryk University		Brno		Czech Republic	Europe	49.198611	16.605
Massachusetts General Hospital		Boston	Massachusetts	United States	North America	42.362806	-71.068631
Massey University		Palmerston North		New Zealand	Oceania	-40.3848	175.6166
Max Planck Institute for Biology of Ageing		cologne		Germany	Europe	50.928056	6.928611
Max Planck Institute for Developmental Biology		Tubingen		Germany	Europe	48.52	9.055556
Max Planck Institute for Molecular Genetics Berlin
Max Planck Institute for Terrestrial Microbiology		Marburg		Germany	Europe	50.81	8.770833
Max Planck Institute of Biogeochemistry		Jena		Germany	Europe	50.927222	11.586111
Max Planck Institute of Biophysical Chemistry		Gottingen		Germany	Europe	51.533889	9.935556
Max Planck Institute of Chemistry		Mainz		Germany	Europe	50	8.26666
Max Planck Institute of Demographic Research		Rostock		Germany	Europe	54.083333	12.133333
Max Planck Institute of Developmental Biology		Tubingen		Germany	Europe	48.52	9.055556
Max Planck Institute of Evolutionary Anthropology		Leipzig		Germany	Europe	51.333333	12.383333
Max Planck Institute for Evolutionary Anthropology		Leipzig		Germany	Europe	51.333333	12.383333
Max Planck Institute of Evolutionary Biology		Plon		Germany	Europe	54.162222	10.421389
Max Planck Institute of Molecular Cell Biology and Genetics		Dresden		Germany	Europe	51.033333	13.733333
Max Planck Institute of Ornithology		Seewiesen		Germany	Europe	47.971111	11.236111
Max Planck Institute of Sciences and Human History		Jena		Germany	Europe	50.927222	11.586111
Max Planck Institute of Terrestrial of Microbiology		Marburg		Germany	Europe	50.81	8.770833
Maynooth University		Maynooth	county Kildare	Ireland	Europe	53.3835	-6.5996
MBE Press Office Kolkata		Kolkata		India	Asia	22.566667	88.366667
MBE Press Office Oxford		Oxford		United Kingdom	Europe	51.751944	-1.257778
MBE Press Office San Diego		San Diego	California	United States	North America	32.715	-117.1625
McGill University	30	Montreal	Quebec	Canada	North America	45.504167	-73.574722
McMaster University		Hamilton	Ontario	Canada	North America	43.263333	-79.918889
Medical Research Council Human Genetics Unit		Edinburgh	Scotland	United Kingdom	Europe	55.962142	-3.234947
Medical University of Vienna	151-200	Vienna		Austria	Europe	48.22	16.351389
Merck Research Laboratories		Kenilworth	New Jersey	United States	North America	40.67742	-74.289341
Michigan State University	51-75	East Lansing	MI	United States	North America	42.723	-84.481
Michigan Technological University		Houghton	Michigan	United States	North America	47.12	-88.55
Middle Tennessee State University		Murfreesboro	Tennessee	United States	North America	35.849	-86.365
Mision biologica de Galicia		Galicia		Spain	Europe	42.5	-8.1
MIT		Cambridge	Massachusetts	United States	North America	42.35982	-71.09211
Monash University	151-200	Melbourne		Australia	Australia	-37.9083	145.138
Montana State University		Bozeman	Montana	United States	North America	45.668333	-111.05
Montreal Botanical Garden		Montreal	Quebec	Canada	North America	45.557222	-73.556806
Morton Arboretum		Lisle	Illinois	United States	North America	41.816872	-88.068811
Moss Landing Marine Laboratories		Moss Landing	CA	United States	North America	36.79441	-121.78762
Mount Sinai Hospital	47	Manhattan	New York	United States	North America	40.790066	-73.953249
Mt. Sinai School of Medicine	47	New York City	NY	United States	North America	40.789475	-73.953781
Murdoch Children's Research Institute		Melbourne	Victoria	Australia	Australia	-37.793611	144.949444
Murray State University		Murray	Kentucky	United States	North America	36.615556	-88.321389
Musee de l'Homme Hommes		Paris		France	Europe	48.86278	2.28861
Museo Nacional Ciencias Nature		Madrid		Spain	Europe	40.383333	-3.716667
Museo Nacional de Ciencias Naturales		Madrid		Spain	Europe	40.383333	-3.716667
Museum National d'Histoire Naturelle		Paris		France	Europe	48.842109	2.356286
Museum Victoria		Melbourne	Victoria	Australia	Australia	-37.813611	144.963056
Myvatn Research Station		Myvatn		Iceland	Europe	65.6	-17
Nagoya University	151-200	Nagoya		Japan	Asia	35.154722	136.966944
Nanjing Agricultural University		Nanjing	Jiangsu	China	Asia	32.031944	118.836667
Nanjing Normal University		Nanjing	Jiangsu	China	Asia	32.056111	118.764444
Nanjing University		Nanjing	Jiangsu	China	Asia	32.056111	118.764444
Nankai University		Tianjin		China	Asia	39.101111	117.164722
Nara Institute of Science and Technology		Ikoma		Japan	Asia	34.732222	135.7325
NARO		Ibaraki		Japan	Asia	36.286889	140.424528
National and Kapodistrian University		Athens		Greece	Europe	37.978333	23.771667
National Biodiversity Center		Leiden		Netherlands	Europe	52.164722	4.473333
National Cancer Institute		Rockville	MD	United States	North America	39.083611	-77.148333
National Center for Biological Sciences		Bangalore	Karnataka	India	Asia	13.0822	77.57627
National Institute for Advanced Studies		Bangalore	Karnataka	India	Asia	13.01978	77.56605
National Institute of Environmental Health Sciences		Research Triangle Park	North Carolina	United States	North America	35.908056	-78.862778
National Institute of Genetics		Mishima	Shizuoka	Japan	Asia	35.1185	138.918556
National Institute of Polar Research		Tokyo		Japan	Asia	35.7125	139.408889
National Institute on Deafness and other Communication Disorders		Bethesda	Maryland	United States	North America	39.000443	-77.102394
National Institutes of Health		Bethesda	Maryland	United States	North America	39.000443	-77.102394
National Marine Mammal Lab		Seattle	Washington	United States	North America	47.609722	-122.333056
National Museum of Natural History		Washington DC		United States	North America	38.8913	-77.0259
National socio-environmental synthesis center		Annapolis	Maryland	United States	North America	38.972944	-76.501158
National Taiwan Normal University		Taipei		Taiwan	Asia	25.016	121.536
National Taiwan University		Taipei		Taiwan	Asia	25.016	121.536
National Tsing Hua University		Hsinchu City		Taiwan	Asia	24.793611	120.992778
National University of Ireland		Maynooth		Ireland	Europe	53.39217	-6.290305
National University of Singapore	76-100	Singapore		Singapore	Asia	1.295556	103.776667
National Zoological Park Front Royal		Front Royal	Virginia	United States	North America	38.933333	-78.2
Natural History Museum		London		United Kingdom	Europe	51.495983	-0.176372
Natural History Museum		London		United Kingdom	Europe	51.495983	-0.176372
Natural History Museum of Denmark		Copenhagen		Denmark	Europe	55.687506	12.575459
Nature Conservancys
Naval Research Lab		Washington DC		United States	North America	38.904722	-77.016389
Netherlands Cancer Institute		Amsterdam		Netherlands	Europe	52.366667	4.9
Netherlands Institute of Ecology		Wageningen		Netherlands	Europe	51.967089	5.658603
New Mexico State University		Las Cruces	New Mexico	United States	North America	32.283	-106.748
New York State Department of Health		Savoie		France	Europe	45.333333	6.833333
New York University	51-75	New York City	NY	United States	North America	40.7127	-74.0059
Newcastle University		Newcastle upon Tyne	England	United Kingdom	Europe	54.978	-1.615
NIH		Bethesda	MD	United States	North America	39.000443	-77.102394
NOAA				United States	North America
NOAA				United States	North America
NOAA				United States	North America
NOAA				United States	North America
NOAA				United States	North America
NOAA Northwest Fisheries Science Center		Seattle	Washington	United States	North America	47.609722	-122.333056
North Carolina State University	101-150	Raleigh	NC	United States	North America	35.786	-78.682
North China Elect Power University		Beijing		China	Asia	39.916667	116.383333
Northeast Normal University		Changchun	Jilin	China	Asia	43.9	125.2
Northeastern University		Boston	MA	United States	North America	42.338889	-71.090278
Northern Arizona University		Flagstaff	AZ	United States	North America	35.188	-111.653
Northern Illinois University		Changchun	Jilin	China	Asia	43.9	125.2
Northwest A&F University		Yangling	Shaanzi Province	China	Asia	34.283333	108.061667
Northwestern University	101-150	Evanston	Illinois	United States	North America	42.054853	-87.673945
Norwegian Institute of National Research		Tromso		Norway	Europe	69.682778	18.942778
Norwegian Institute of Nature Research Tromso		Tromso		Norway	Europe	69.682778	18.942778
Norwegian Institute of Nature Research Trondheim		Trondheim		Norway	Europe	69.682778	18.942778
Norwegian University of Life Sciences		As		Norway	Europe	59.665108	10.765228
Norwegian University of Science and Technology	51-75	Trondheim		Norway	Europe	63.419444	10.4025
Novartis Cambridge		Cambridge	Massachusetts	United States	North America	42.373611	-71.110556
NPS Centeral Alaska Network				United States	North America
Oakland University		Auburn Hills	Michigan	United States	North America	42.672659	-83.215776
Occidental College		Los Angeles	CA	United States	North America	34.12715	-118.2109
Ohio State University	76-100	Columbus	OH	United States	North America	40	-83.0145
Ohio University		Athens	OH	United States	North America	39.3275	-82.1
Okinawa Institute of Science & Technology		Onna	Okinawa	Japan	Asia	26.461947	127.831056
Oklahoma State University		Stillwater	OK	United States	North America	36.132222	-97.080833
Open University		Milton Keynes		United Kingdom	Europe	52.04	-0.76
Oregon State University	76-100	Corvallis	OR	United States	North America	44.564	-123.279
Osaka University	51-75	Osaka		Japan	Asia	34.819167	135.526667
Oslo University Hospital		Oslo		Norway	Europe	59.9486	10.7153
Oxford Brookes University		Oxford		United Kingdom	Europe	51.754267	-1.2227
Pacific Ecoinformatics and Computational Ecology Lab		Berkeley	California	United States	North America	37.871667	-122.272778
Pacific Northwest Research Institute Seattle		Seattle	Washington	United States	North America	47.609722	-122.333056
Palacky University		Olomouc		Czech Republic	Europe	49.59508	17.25914
Panthera
Parc National Vanoise		Savoie		France	Europe	45.333333	6.833333
Pasteur Institute		Paris		France	Europe	48.84	2.311667
Paul Scherrer Institute		Villigen		Switzerland	Europe	47.533333	8.216667
Paul Valéry University of Montpellier		Montpellier		France	Europe	43.633	3.87
Peking University	151-200	Beijing		China	Asia	39.989722	116.305278
Penn State	51-75	State College	PA	United States	North America	40.796111	-77.862778
Peregrine Fund
Pierre and Marie Curie University	76-100	Paris		France	Europe	48.847222	2.356389
Plymouth University		Plymouth	England	United Kingdom	Europe	50.374121	-4.138512
Polish Academy of Science		Warsaw		Poland	Europe	52.233333	21.016667
Pontificia Universidad Catolica de Chile		Santiago		Chile	South America	-33.441	-70.6408
Portland State University		Portland	OR	United States	North America	45.512778	-122.685278
Potsdam Institute of Climate Impact Research		Potsdam		Germany	Europe	52.4	13.066667
Princeton University	51-75	Princeton	NJ	United States	North America	40.343	-74.657
Progentech Emeryville		Emeryville	California	United States	North America	37.831389	-122.285278
PSL Research University		Paris		France	Europe	48.8567	2.3508
Purdue University	101-150	West Lafayette	Indiana	United States	North America	40.424	-86.929
Queen Mary University of London	76-100	London		United Kingdom	Europe	51.523056	-0.040278
Queen's University		Kingston	Ontario	Canada	North America	44.224997	-76.495099
Queen's University Belfast		Belfast	Northern Ireland	United Kingdom	Europe	54.584167	-5.934722
Queens University		Kingston	Ontario	Canada	North America	44.224997	-76.495099
Queensland Herbarium		Brisbane	Queensland	Australia	Australia	-27.4765	152.9761
Queensland Institute of Medical Research Brisbane		Brisbane	Quebec	Australia	Australia	-27.448	153.023
Queensland Institute of Medical Research		Brisbane	Quebec	Australia	Australia	-27.448	153.023
Queensland University of Technology		Brisbane	Queensland	Australia	Australia	-27.476944	153.028056
Radboud University	101-150	Nijmegen		Netherlands	Europe	51.85	5.866667
Reprogenetics UK
Rhodes University		Grahamstown	Eastern Cape	South Africa	Africa	-33.313611	26.519722
Rice University		Houston	TX	United States	North America	29.716944	-95.402778
RIKEN Center for Integrated Medicine and Science		Yokohama		Japan	Asia	35.444167	139.638056
RMIT University		Melbourne	Victoria	Australia	Australia	-37.8082	144.9643
Robert Koch Institute		Berlin		Germany	Europe	52.516667	13.383333
Rocky Mountain Biological Labs		Crested Butte	Colorado	United States	North America	38.883326	-106.943655
Rothamsted Research		Harpenden	Hertfordshire	United Kingdom	Europe	51.8175	-0.3524
Royal Botanic Gardens
Royal Netherlands Institute of Sea Research		Texel		Netherlands	Europe	53.05	4.8
Royal Veterinary and Agricultural University		Frederiksberg	Copenhagen	Denmark	Europe	55.666667	12.533333
RSPB
Russian Academy of Science		Moscow		Russia	Europe	55.710794	37.577814
Rutgers-State University of New Jersey	76-100	New Brunswick	NJ	United States	North America	40.501667	-74.448056
Salisbury University		Salisbury	Maryland	United States	North America	38.345556	-75.605833
Salzburg University		Salzburg		Austria	Europe	47.797222	13.048056
Sam Houston State University		Huntsville	Texas	United States	North America	30.713889	-95.547222
San Diego State University		San Diego	CA	United States	North America	32.775278	-117.072222
San Francisco State University		San Francisco	California	United States	North America	37.723333	-122.479722
San Pietro Fatebenefratelli Hospital Rome		Rome		Italy	Europe	41.9	12.5
Santa Clara University		Santa Clara	CA	United States	North America	37.349167	-121.938056
Santa Fe institute		Santa Fe	NM	United States	North America	35.7005	-105.9086
Sao Paula State University
School of Advanced Sciences		Hayama	Kanagawa	Japan	Asia	35.2611	139.6084
Scripps Institute of Oceanography		San Diego	California	United States	North America	32.865437	-117.253626
Scripps Research Institute		San Diego	California	United States	North America	32.715	-117.1625
Seattle Children's Research Institute		Seattle	WA	United States	North America	47.662778	-122.281667
Senckenberg Biodiversity and Climate Research Center
Seoul National University	76-100	Seoul		South Korea	Asia	37.46	126.95
Shandong University		Jinan	Shandong	China	Asia	36.673611	117.053889
Shantou University		Shantou	Guangdong	China	Asia	23.4156	116.63
Simon Fraser University		Burnaby	BC	Canada	North America	49.276765	-122.917957
Slovak Academy of Science		Bratislava		Slovakia	Europe	48.143889	17.109722
Smith College		Northampton	Massachusetts	United States	North America	42.318119	-72.638139
Smithsonian Environmental Research Center		Edgewater	MD	United States	North America	38.88662	-76.54265
Smithsonian Institution		Washington DC		United States	North America	38.889	-77.026
National Museum of Natural History Smithsonian Institution
Smithsonian Tropical Research Institute		Barro Colorado Island		Panama	North America	9.16502	-79.83686
Sorbonne University		Paris		France	Europe	48.848611	2.342778
South Dakota State University		Brookings	SD	United States	North America	44.318056	-96.783333
Southern illinois University		Carbondale	IL	United States	North America	37.726	-89.22
Southern Illinois University		Carbondale	IL	United States	North America	37.726	-89.22
Southern Medical University		Guangzhou	Guangdong	China	Asia	23.1862	113.3337
St Jude Children's Research Hospital		Memphis	Tennessee	United States	North America	35.153469	-90.042207
St. Louis University		St. Louis	MO	United States	North America	38.636497	-90.233903
Stanford Law School		Palo Alto	CA	United States	North America	37.43	-122.17
Stanford University	4	Palo Alto	CA	United States	North America	37.43	-122.17
Stanford University School of Medicine	4	Palo Alto	CA	United States	North America	37.43	-122.17
Stanford University School of Medicine	4	Palo Alto	CA	United States	North America	37.43	-122.17
Stanford University Medical Center	4	Palo Alto	CA	United States	North America	37.43	-122.17
State University of Campinas		Campinas	Sao Paulo	Brazil	South America	-22.817222	-47.069444
Station d'Ecologie Experimentale du CNRS
Stockholm University	101-150	Stockholm		Sweden	Europe	59.365278	18.058333
Stony Brook University	151-200	Stony Brook	NY	United States	North America	40.914224	-73.11623
Stowers Institute of Medical Research		Kansas City	Missouri	United States	North America	39.099722	-94.578333
Sun Yat Sen University		Guangzhou	Guangdong	China	Asia	23.133333	113.266667
Sungkyunkwan University		Seoul		South Korea	Asia	37.587222	126.994167
SUNY Albany		Albany	New York	United States	North America	42.686193	-73.823884
SUNY Buffalo		Buffalo	New York	United States	North America	43	-78.79
SUNY College of Environmental Science and Forestry		Syracuse	New York	United States	North America	43.034793	-76.135475
SUNY College Purchase		Purchase	New York	United States	North America	41.047285	-73.702126
SUNY Stony Brook		Stony Brook	NY	United States	North America	40.914224	-73.11623
Swansea University		Swansea	Wales	United Kingdom	Europe	51.609722	-3.980556
Swansea University		Swansea	Wales	United Kingdom	Europe	51.616667	-3.95
Swedish Museum of Natural History		Stockholm		Sweden	Europe	59.368889	18.053611
Swedish University of Agricultural Sciences	101-150	Ultuna	Uppsala	Sweden	Europe	59.815	17.663
Swiss Federal Institute of Forest Snow and Landscape Research				Switzerland	Europe
Swiss Federal Institute of Technology	48			Switzerland	Europe
Swiss Federal Research Institute				Switzerland	Europe
Swiss Federal Research Institute WSL				Switzerland	Europe	47.3604	8.4549
Swiss Ornithological Institute		Sempach	Lucerne	Switzerland	Europe	47.133333	8.2
Syracuse University		Syracuse	NY	United States	North America	43.03767	-76.13399
Tata Institute of Fundamental Research Karnataka		Mumbai		India	Asia	18.90757	72.80601
Tata Institute of Fundamental Research Maharashtra		Mumbai		India	Asia	18.90757	72.80601
Technische Universitat Munchen		Munich		Germany	Europe	48.148056	11.568056
Technological University of Denmark	101-150	Copenhagen		Denmark	Europe	55.785797	12.521533
Technological University of Dresden	151-200	Dresden		Germany	Europe	51.028056	13.726667
Technological University of Ilmenau		Ilmenau		Germany	Europe	50.681667	10.938889
Technological University of Munich	51-75	Munich		Germany	Europe	48.148056	11.568056
Technological University of Zvolen		Zvolen		Slovakia	Europe	48.573	19.1165
Tel Aviv Medical Center		Tel Aviv		Israel	Asia	32.080556	34.79
Tel Aviv University		Tel Aviv		Israel	Asia	32.111767	34.801361
Temple University		Philadelphia	PA	United States	North America	39.981	-75.155
Tennessee State University		Nashville	Tennessee	United States	North America	36.166667	-86.830556
Texas A&M University	151-200	College Station	TX	United States	North America	30.610369	-96.344056
Texas Biomedical Research Institute		San Antonio	Texas	United States	North America	29.436667	-98.637222
Texas Parks and Wildlife Department			Texas	United States	North America
Texas State University		San Marcos	TX	United States	North America	29.888889	-97.938889
The Florey Institute of Neuroscience and Mental Health Melbourne
The Hospital for Sick Children		Toronto	Ontario	Canada	North America	43.6571	-79.3885
The University of Western Australia Nedlands		Perth		Australia	Australia	-31.980278	115.818611
Thomas Jefferson University		Philadelphia	PA	United States	North America	39.9484	-75.1567
Tohoku University	151-200	Sendai	Miyagi	Japan	Asia	38.254167	140.873611
Tokyo Institute of Technology		Tokyo		Japan	Asia	35.513889	139.483333
Tokyo Medical and Dental University		Bunkyo	Tokyo	Japan	Asia	35.701389	139.765278
Tokyo Metropolitan University		Tokyo		Japan	Asia	35.616667	139.377222
Toulouse University		Toulouse		France	Europe	43.604444	1.443889
Trent University		Peterborough	Ontario	Canada	North America	44.357764	-78.289561
Trinity College
Trinity College Dublin	151-200	Dublin		Ireland	Europe	53.3444	-6.2577
Tsinghua University	101-150	Beijing		China	Asia	40	116.326667
Tufts University	101-150	Medford	Massachusetts	United States	North America	42.406	-71.12
Tulane University		New Orleans	LA	United States	North America	29.935344	-90.122687
Tunghai University		Xitun	Taichung	Taiwan	Asia	24.177961	120.603662
Umea University	151-200	Umea		Sweden	Europe	63.820556	20.303611
UNAM
Universidad Autonoma de Madrid		Madrid		Spain	Europe	40.5453	-3.69611
Universidad Autónoma de Madrid		Madrid		Spain	Europe	40.5453	-3.69611
Universidad Autonoma de Yucatan		Merida	Yucatan	Mexico	North America	20.969722	-89.623056
Universidad de Alcala		Alcala de Henares		Spain	Europe	40.482536	-3.361151
Universidad De Granada		Granada		Spain	Europe	37.178056	-3.600833
Universidad de Sevilla		Seville		Spain	Europe	37.3801	-5.9916
Universidad del Comahue		Buenos Aires		Argentina	South America	-38.940939	-68.0552
Universidad Nacional Autonoma de Mexico	151-200	Mexico City		Mexico	North America	19.328889	-99.187222
Universidad Nacional del Comahue		Neuquen		Argentina	South America	-38.940939	-68.0552
Universidad Tecnica Estatal de Quevedo		Quevedo		Ecuador	South America	-1.033333	-79.45
Universidad Tecnica Lisboa		Lisbon		Portugal	Europe	38.7525	-9.158889
Universidade de Brasilia		Brasilia		Brazil	South America	-15.761389	-47.866389
Universidade Estadual Paulista				Brazil	South America	-22.8172	-47.0694
Universidade Estadual Santa Cruz		Ilheus		Brazil	South America	-14.788889	-39.048889
Universidade Federal de Goias		Goiania		Brazil	South America	-16.666667	-49.25
Universitat Autonoma Barcelona		Barcelona		Spain	Europe	41.500278	2.107778
CREAF Universitat Autonoma Barcelona		Barcelona		Spain	Europe	41.500278	2.107778
Universitat Basel		Basel		Switzerland	Europe	47.55858	7.5836
Universitat Leipzig		Leipzig		Germany	Europe	51.339	12.379
Universitat Munster	151-200	Munster		Germany	Europe	51.964	7.613
Universitat Politecnica de Catalunya		Barcelona		Spain	Europe	41.389444	2.115833
Universitat Politecnica de Valencia		Valencia		Spain	Europe	39.481653	-0.343808
Université Claude Bernard Lyon I		Lyon		France	Europe	45.78098	4.86759
Universite Clermont Ferrand		Clermont-Ferrand	Auvergne	France	Europe	45.770556	3.088611
Universite d'Auvergne Clermont-Ferrand I		Clermont-Ferrand	Auvergne	France	Europe	45.770556	3.088611
Universite de bourgogne		Dijon		France	Europe	47.3125	5.070833
Universite de Moncton		Moncton		Canada	North America	46.105	-64.7819
Universite de Montpellier	151-200	Montpellier		France	Europe	43.622222	3.861667
Universite de Montpellier 2		Montpellier		France	Europe	43.631944	3.863889
Universite de Montpellier 3		Montpellier		France	Europe	43.633	3.87
Universite de Savoie		Annecy-le-Vieux		France	Europe	45.559444	5.912778
Universite de Sherbrooke		Sherbrooke	Quebec	Canada	North America	45.379406	-71.927661
Universite du Quebec a Rimouski		Rimouski	Quebec	Canada	North America	48.452906	-68.512783
Universite Grenoble		Grenoble		France	Europe	45.191667	5.772978
Universite Grenoble Alpes		Grenoble		France	Europe	45.187778	5.726944
Universite Joseph Fourier		Grenoble		France	Europe	45.191667	5.772978
Universite Laval	151-200	Quebec City	Quebec	Canada	North America	46.78	-71.274722
Universite libre de Bruxelles		Brussels		Belgium	Europe	50.811667	4.381111
Universite Libre de Bruxelles		Brussels		Belgium	Europe	50.811667	4.381111
Universite Liege		Liege	Wallonia	Belgium	Europe	50.640833	5.574722
Universite Lyon		Lyon		France	Europe	45.748151	4.852352
Universite Lyon 1		Lyon		France	Europe	45.78098	4.86759
Universite Paris 06		Paris		France	Europe	48.847222	2.356389
Universite Paris 07		Paris		France	Europe	48.829722	2.380833
Universite Paris 11		Paris		France	Europe	48.6993	2.1875
Universite Paris Descartes	101-150	Paris		France	Europe	48.851389	2.340556
Universite Paris Diderot		Paris		France	Europe	48.829722	2.380833
Universite Paris Saclay		Paris-Saclay		France	Europe	48.711734	2.171289
Universite Paris Sud	101-150	Paris		France	Europe	48.6993	2.1875
Universite Paris-Sud	101-150	Paris		France	Europe	48.6993	2.1875
Universite Paul Valery		Montpellier		France	Europe	43.633	3.87
Universite Pierre et Marie Curie	76-100	Paris		France	Europe	48.847222	2.356389
Universite Rennes 1		Rennes		France	Europe	48.117976	-1.637993
Universiti Brunei Darussalam		Bandar Seri Begawan		Brunei	Asia	4.97646	114.895
University Austral Chile		Coihaique	Aisen	Chile	South America	-39.8073	-73.2511
University College Cork		Cork		Ireland	Europe	51.893	-8.493
University College Dublin	151-200	Dublin		Ireland	Europe	53.308333	-6.222222
University College London	9	London	England	United Kingdom	Europe	51.524789	-0.133578
University Complutense Madrid		Madrid		Spain	Europe	40.449167	-3.728056
University Estadual Campinas		Sao Paulo		Brazil	South America	-22.817222	-47.069444
University Federal Goias		Goiania		Brazil	South America	-16.666667	-49.25
University Federal Lavras		Lavras		Brazil	South America	-21.245	-45
University Federal Parana			Parana	Brazil	South America	-12.1975	-38.9667
University Federal Pernambuco		Recife		Brazil	South America	-8.05	-34.9
University Federal Rio de Janeiro		Rio de Janeuro		Brazil	South America	-22.908333	-43.196389
University Federal Rio Grande do Norte		Natal	Rio Grande do Norte	Brazil	South America	-5.83977	-35.2012
University Federal Rio Grande do Sul		Bento Goncalves	Rio Grande do Sul	Brazil	South America	-29.170833	-51.518889
University Federal Santa Catarina		Florianopolis	Santa Catarina	Brazil	South America	-27.601111	-48.52
University Federal Santa Maria		Santa Maria	Rio Grande do Sul	Brazil	South America	-29.7134	-53.717
University Federal Sao Joao del Rei		Sao Joao del-Rei	Minas Gerais	Brazil	South America	-21.135833	-44.261944
University Federal Uberlandia		Minas Gerais	Uberlandia	Brazil	South America	-18.918611	-48.257778
University Federal Vicosa		Vicosa	Minas Gerais	Brazil	South America	-20.7603	-42.8678
University La Laguna		San Cristobal de la Laguna	Tenerife	Spain	Europe	28.268611	-16.605556
University La Rochelle		La Rochelle		France	Europe	46.147778	-1.155
University La Serena		La Serena		Chile	South America	-29.913889	-71.241389
University Louis Pasteur		Strasbourg		France	Europe	48.58	7.75
University Medical Center at Erasmus Medical College		Rotterdam		Netherlands	Europe	51.918056	4.525833
University Medical School Bonn		Bonn		Germany	Europe	50.733889	7.102222
University Milano Bicocca		Milan		Italy	Europe	45.514444	9.213333
University Modena and Reggio Emilia		Emilia-Romagna		Italy	Europe	44.645	10.927778
University Montpellier 5		Montpellier		France	Europe	43.6119	3.8772
University Nacional Columbia Amazonia
University Nacional Comahue		Neuquen		Argentina	South America	-38.940939	-68.0552
University Nacional General Sarmiento		Malvinas Argentinas		Argentina	South America	-34.522222	-58.7
University Nacional Rosario		Rosario		Argentina	South America	-32.942778	-60.65
University of Aberdeen	151-200	Aberdeen	Scotland	United Kingdom	Europe	57.165	-2.1
University of Adelaide	76-100	Adelaide		Australia	Australia	-34.919159	138.60414
University of Agder		Kristiansand		Norway	Europe	58.163006	8.003222
University of Agriculture		Beijing		China	Asia	40.0025	116.352778
University of Agriculture				Poland	Europe
University of Akron		Akron	OH	United States	North America	41.075235	-81.511538
University of Alabama		Tuscaloosa	Alabama	United States	North America	33.209438	-87.541493
University of Alabama at Birmingham	101-150	Birmingham	AB	United States	North America	33.525	-86.813
University of Alaska
University of Alaska Anchorage		Anchorage	Alaska	United States	North America	61.189886	-149.827014
University of Alaska Fairbanks		Fairbanks	AK	United States	North America	64.858889	-147.835556
University of Alaska Museum		Fairbanks	Alaska	United States	North America	64.858889	-147.835556
University of Alberta	101-150	Edmonton	AB	Canada	North America	53.524444	-113.524444
University of Alcala		Alcala de Henares		Spain	Europe	40.482536	-3.361151
University of Amsterdam	101-150	Amsterdam		Netherlands	Europe	52.368333	4.890278
University of Antilles Guyane
University of Antioquia		Medellin		Colombia	South America	6.267417	-75.568389
University of Antwerp	151-200	Antwerp		Belgium	Europe	51.222778	4.41
University of Arizona	76-100	Tucson	AZ	United States	North America	32.231667	-110.951944
University of Arkansas		Fayetteville	AK	United States	North America	36.068681	-94.176012
University of Auckland	151-200	Auckland		New Zealand	Oceania	-36.85	174.77
University of Auvergne		Clermont-Ferrand	Auvergne	France	Europe	45.770556	3.088611
University of Aveiro		Aveiro		Portugal	Europe	40.6303	-8.6575
University of Barcelona	151-200	Barcelona	Catalonia	Spain	Europe	41.386667	2.163889
University of Basel	51-75	Basel		Switzerland	Europe	47.55858	7.5836
University of Bath		Bath	Somerset	United Kingdom	Europe	51.3796	-2.328
University of Bayreuth		Bayreuth		Germany	Europe	49.928889	11.585833
University of Bergen		Bergen		Norway	Europe	60.388086	5.322872
University of Bern		Bern		Switzerland	Europe	46.950519	7.438109
University of Bielefeld		Bielefeld		Germany	Europe	52.037778	8.493056
University of Bonn	101-150	Bonn		Germany	Europe	50.733889	7.102222
University of Bordeaux		Talence		France	Europe	44.806944	-0.6
University of Bourgogne		Dijon	Bourgogne	France	Europe	47.3125	5.070833
University of Bradford		Bradford	England	United Kingdom	Europe	53.791667	-1.762222
University of Brasilia		Brasilia		Brazil	South America	-15.761389	-47.866389
University of Bremen		Bremen		Germany	Europe	53.108611	8.853611
University of Bristol	101-150	Bristol	England	United Kingdom	Europe	51.456389	-2.604444
University of British Columbia	41	Vancouver	BC	Canada	North America	49.261111	-123.253056
University of British Columbia Okanagan		Kelowna	British Columbia	Canada	North America	49.9396	-119.3963
University of Buenos Aires		Buenos Aires		Argentina	South America	-34.599722	-58.373056
University of Calgary	151-200	Calgary	AB	Canada	North America	51.0775	-114.133056
University of California
University of California
University of California
University of California
University of California
University of California
University of California
University of California Berkeley	7	Berkeley	CA	United States	North America	37.87	-122.259
University of California Davis	35	Davis	CA	United States	North America	38.54	-121.75
University of California Irvine	76-100	Irvine	CA	United States	North America	33.645556	-117.8425
University of California Los Angeles	15	Los Angeles	CA	United States	North America	34.072222	-118.444097
University of California Merced		Merced	CA	United States	North America	37.366	-120.4235
University of California Riverside	151-200	Riverside	CA	United States	North America	33.975556	-117.331111
University of California San Diego	13	San Diego	CA	United States	North America	32.881	-117.238
University of California San Francisco	5	San Francisco	CA	United States	North America	37.763319	-122.458539
University of California Santa Barbara	76-100	Santa Barbara	CA	United States	North America	34.425833	-119.714167
University of California Santa Cruz	42	Santa Cruz	CA	United States	North America	37	-122.06
University of Cambridge	2	Cambridge	England	United Kingdom	Europe	52.205278	0.117222
University of Campinas		Campinas	Sao Paulo	Brazil	South America	-22.817222	-47.069444
University of Cantabria		Santander		Spain	Europe	43.473	-3.801
University of Canterbury		Christchurch		New Zealand	Oceania	-43.523333	172.581944
University of Cape Town	151-200	Cape Town		South Africa	Africa	-33.9575	18.460556
University of Cardenal Herrera CEU		Valencia		Spain	Europe	39.55	-0.387778
University of Central Florida		Orlanda	Florida	United States	North America	28.6016	-81.2005
University of Chicago	49	Chicago	IL	United States	North America	41.789722	-87.599722
University of Chile		Santiago		Chile	South America	-33.45	-70.666667
University of Cincinnati		Cincinnati	OH	United States	North America	39.131	-84.516
University of Coimbra		Coimbra		Portugal	Europe	40.2074	-8.4265
University of Cologne		Cologne		Germany	Europe	50.928056	6.928611
University of Colorado	76-100	Boulder	CO	United States	North America	40.006667	-105.267222
University of Colorado Denver		Denver	CO	United States	North America	39.76185	-104.881105
University of Connecticut		Storrs	CT	United States	North America	41.807167	-72.2525
University of Copenhagen	38	Copenhagen		Denmark	Europe	55.679722	12.5725
University of Debrecen		Debrecen		Hungary	Europe	47.553889	21.621389
University of Delaware	151-200	Newark	DE	United States	North America	39.679111	-75.752167
University of Dublin		Dublin		Ireland	Europe	53.3444	-6.2577
University of Dublin Trinity College		Dublin		Ireland	Europe	53.3444	-6.2577
University of Dundee	101-150	Dundee	Scotland	United Kingdom	Europe	56.457222	-2.980278
University of Durham		Durham	North East England	United Kingdom	Europe	54.773	-1.574
University of Dusseldorf		Dusseldorf		Germany	Europe	51.190278	6.794167
University of East Anglia	76-100	Norwich		United Kingdom	Europe	52.621667	1.241667
University of East Anglia	76-100	Norwich		United Kingdom	Europe	52.621667	1.241667
University of Edinburgh	43	Edinburgh	Scotland	United Kingdom	Europe	55.947389	-3.187194
University of Evora		Evora		Portugal	Europe	38.5731	-7.9044
University of Exeter	76-100	Exeter		United Kingdom	Europe	50.736509	-3.534422
University of Florida	51-75	Gainesville	FL	United States	North America	29.64833	-82.34944
University of Freiburg	51-75	Freiburg im Breisgau		Germany	Europe	47.994167	7.846944
University of Fribourg		Fribourg		Switzerland	Europe	46.80625	7.15174
Universite Fribourg		Fribourg		Switzerland	Europe	46.80625	7.15174
University of Fukui		Fukui		Japan	Asia	36.076944	136.211944
University of Gdansk		Gdansk		Poland	Europe	54.399444	18.568611
University of Geneva	76-100	Geneva		Switzerland	Europe	46.2	6.15
University of Geneva Medical School		Geneva		Switzerland	Europe	46.2	6.15
University of Georgia	101-150	Athens	GA	United States	North America	33.9558	-83.3745
University of Georgia Marine Institute		Sapelo Island	GA	United States	North America	31.4775	-81.241667
University of Ghent	37	Ghent		Belgium	Europe	51.05	3.733333
University of Giessen		Giessen	Hesse	Germany	Europe	50.580833	8.676389
University of Girona		Girona	Catalonia	Spain	Europe	41.985833	2.827222
University of Glasgow	101-150	Glasgow	Scotland	United Kingdom	Europe	55.871944	-4.2875
University of Goettingen	49	Goettingen		Germany	Europe	51.541944	9.934444
University of Gothenburg	76-100	Gothenburg		Sweden	Europe	57.698333	11.971667
University of Gottingen		Goettingen		Germany	Europe	51.541944	9.934444
University of Groningen	101-150	Groningen		Netherlands	Europe	53.219167	6.562778
University of Guelph	101-150	Guelph	Ontario	Canada	North America	43.533333	-80.223611
University of Haifa		Haifa		Israel	Asia	32.7625	35.018056
University of Halle Wittenberg		Halle		Germany	Europe	51.486389	11.968889
University of Hamburg		Hamburg		Germany	Europe	53.566944	9.983889
University of Hawaii		Honolulu	Hawaii	United States	North America	21.297	-157.817
University of Hawaii Manoa		Honolulu	Hawaii	United States	North America	21.297	-157.817
University of Helsinki	51-75	Helsinki		Finland	Europe	60.169444	24.95
University of Hohenheim	151-200	Stuttgart		Germany	Europe	48.7114	9.2095
University of Hong Kong	101-150	Pokfulam		Hong Kong	Asia	22.284167	114.137778
University of Hull		Kingston upon Hull	England	United Kingdom	Europe	53.770263	-0.367141
University of Iceland		Reykjavik		Iceland	Europe	64.140556	-21.949444
University of Idaho		Moscow	ID	United States	North America	46.726	-117.011
University of Illinois	29	Urbana	IL	United States	North America	40.110539	-88.228411
University of Illinois at Chicago		Chicago	IL	United States	North America	41.871667	-87.649167
University of Illinois Chicago		Chicago	IL	United States	North America	41.871667	-87.649167
University of Innsbruck		Innsbruck	Tyrol	Austria	Europe	47.262778	11.384444
University of Iowa	101-150	Iowa City	IA	United States	North America	41.65	-91.533333
University of Johannesburg		Johannesburg		South Africa	Africa	-26.183333	27.998889
University of Jyvaskyla		Jyvaskyla		Finland	Europe	62.23625	25.732667
University of Kansas	151-200	Lawrence	KS	United States	North America	38.958056	-95.247778
University of Keele		Newcastle-under-Lyme	England	United Kingdom	Europe	53.003	-2.273
University of Kent		Kent		United Kingdom	Europe	51.297	1.069
University of Kentucky		Lexington	KT	United States	North America	38.033333	-84.5
University of Kiel	151-200	Kiel		Germany	Europe	54.338889	10.1225
University of Kiev		Kiev		Ukraine	Europe	50.441903	30.511314
University of Konstanz		Konstanz	Baden-Wurttemberg	Germany	Europe	47.69	9.188
University of Lancaster		Lancaster	England	United Kingdom	Europe	54.010278	-2.785556
University of Lausanne	101-150	Lausanne		Switzerland	Europe	46.5225	6.579444
University of Leeds	101-150	Leeds		United Kingdom	Europe	53.807222	-1.551667
University of Leicester		Leicester	England	United Kingdom	Europe	52.621389	-1.124444
University of Leipzig		Leipzig		Germany	Europe	51.339	12.379
University of Lethbridge		Lethbridge	AB	Canada	North America	49.666667	-112.863889
University of Leuven		Leuven	Flanders	Belgium	Europe	50.878	4.7
University of Leuven		Leuven	Flanders	Belgium	Europe	50.878	4.7
University of Leuven		Leuven		Belgium	Europe	50.878	4.7
University of Liège		Liege	Wallonia	Belgium	Europe	50.640833	5.574722
University of Lincoln		Lincoln		United Kingdom	Europe	53.23272	-0.537661
University of Lisbon		Lisbon		Portugal	Europe	38.713889	-9.139444
University of Liverpool	101-150	Liverpool	England	United Kingdom	Europe	53.406	-2.967
University of Ljubljana		Ljubljana		Slovenia	Europe	46.048889	14.503889
University of London		London		United Kingdom	Europe	51.521111	-0.128889
University of London Imperial College of Science and Technology		London		United Kingdom	Europe	51.498356	-0.176894
University of Los Andres		Bogota		Colombia	South America	4.601613	-74.065173
University of Louisiana at Lafayette		Lafayette	LA	United States	North America	30.2126	-92.0193
University of Louisiana Lafayette		Lafayette	LA	United States	North America	30.2126	-92.0193
University of Luneburg		Luneburg		Germany	Europe	53.228889	10.401111
University of Maine		Orono	ME	United States	North America	44.8994	-68.6681
University of Manchester	101-150	Manchester	England	United Kingdom	Europe	53.465556	-2.233611
University of Marburg		Marburg		Germany	Europe	50.810833	8.773611
University of Maryland	51-75	College Park	MD	United States	North America	38.9875	-76.94
University of Massachusetts
University of Massachusetts Amherst	101-150	Amhest	MA	United States	North America	42.388889	-72.527778
University of Massachusetts Boston		Boston	MA	United States	North America	42.313432	-71.038445
University of Melbourne	25	Melbourne		Australia	Australia	-37.7963	144.9614
University of Miami	151-200	Coral Gables	Florida	United States	North America	25.721644	-80.279267
University of Miami Miller School of Medicine		Miami	FL	United States	North America	25.721644	-80.279267
University of Michigan	28	Ann Arbor	MI	United States	North America	42.283	-83.735
University of Minnesota	32	Minneapolis	MN	United States	North America	44.974747	-93.235353
University of Minnesota Duluth		Duluth	MN	United States	North America	46.8	-92.1
University of Mississippi		Oxford	MS	United States	North America	34.365	-89.538
University of Missouri	101-150	Columbia	Missouri	United States	North America	38.9453	-92.3288
University of Missouri Saint Louis		Saint Louis	MO	United States	North America	38.7102	-90.311055
University of Montana		Missoula	MT	United States	North America	46.86	-113.985278
University of Montreal	101-150	Montreal	Quebec	Canada	North America	45.504722	-73.612778
Universite Montreal	101-150	Montreal	Quebec	Canada	North America	45.504722	-73.612778
University of Munich	51-75	Munich		Germany	Europe	48.150833	11.580278
Ludwig Maximilians University of Munich	51-75	Munich		Germany	Europe	48.150833	11.580278
University of Munster	151-200	Munster	North Rhine-Westphalia	Germany	Europe	51.964	7.613
University of Nantes		Nantes		France	Europe	47.24	-1.55
University of Natural Resources and Life Sciences Vienna		Vienna		Austria	Europe	48.236667	16.337222
University of Nebraska	101-150	Lincoln	NE	United States	North America	40.8175	-96.701389
University of Neuchatel		Neuchatel		Switzerland	Europe	46.99373	6.938547
University of Nevada Reno		Reno	Nevada	United States	North America	39.545833	-119.816667
University of New Hampshire		Durham	NH	United States	North America	43.13556	-70.93333
University of New Mexico		Albuquerque	NM	United States	North America	35.08389	-106.61861
University of New Orleans		New Orleans	Louisiana	United States	North America	30.0275	-90.0671
University of New South Wales	101-150	Sydney		Australia	Australia	-33.916921	151.232514
University of Newcastle		Callaghan	New South Wales	Australia	Australia	-32.892778	151.704444
University of North Carolina Chapel Hill	19	Chapel Hill	NC	United States	North America	35.908333	-79.05
University of Northern Colorado		Greeley	Colorado	United States	North America	40.404853	-104.696741
University of Norway (University of Tromso/Artic Univ Norway)
University of Norway
University of Notre Dame		South Bend	Indiana	United States	North America	41.702995	-86.238972
University of Nottingham	51-75	Nottingham	England	United Kingdom	Europe	52.939	-1.197
University of Nova Lisboa		Lisbon		Portugal	Europe	38.733611	-9.160278
University of Oklahoma		Norman	Oklahoma	United States	North America	35.208611	-97.445833
University of Oldenburg		Oldenburg		Germany	Europe	53.147778	8.182222
University of Oregon		Eugene	OR	United States	North America	44.045	-123.075
University of Oslo	51-75	Oslo		Norway	Europe	59.939936	10.722064
University of Osnabruck		Osnabruck	Lower Saxony	Germany	Europe	52.273	8.042
University of Otago		Dunedin		New Zealand	Oceania	-45.865556	170.513889
University of Otago		Dunedin	Otago	New Zealand	Oceania	-45.865556	170.513889
University of Ottawa		Ottawa	Ontario	Canada	North America	45.4222	-75.6824
University of Oulu		Oulu		Finland	Europe	65.059167	25.466111
University of Oviedo		Oviedo	Asturias	Spain	Europe	43.3618	-5.8463
University of Oxford	10	Oxford	England	United Kingdom	Europe	51.7611	-1.2534
University of Pablo de Olivde
University of Padua		Padua		Italy	Europe	45.416667	11.866667
University of Pennsylvania	22	Philadelphia	PA	United States	North America	39.95	-75.19
University of Pennsylvania School of Medicine		Philadelphia	PA	United States	North America	39.95	-75.19
University of Perpignan		Perpignan		France	Europe	42.6833	2.90167
University of Picardie Jules Verne		Amiens		France	Europe	49.8768	2.2646
University of Pittsburgh	44	Pittsburgh	PA	United States	North America	40.444565	-79.953274
University of Poitiers		Poitiers		France	Europe	46.586111	0.343889
University of Porto		Porto		Portugal	Europe	41.146667	-8.615556
University of Potsdam		Potsdam		Germany	Europe	52.401111	13.011944
University of Pretoria		Pretoria		South Africa	Africa	-25.753611	28.229722
University of Puerto Rico Rio Piedras		Rio Piedras	San Juan	Puerto Rico	North America	18.402778	-66.05
University of Quebec	151-200	Quebec City	Quebec	Canada	North America	48.42	-71.0525
University of Quebec Abitibi Temiscaming		Val-d'Or	Quebec	Canada	North America	48.231944	-79.005556
University of Quebec at Montreal		Montreal	Quebec	Canada	North America	45.513889	-73.560278
University of Queensland	20	Brisbane	Queensland	Australia	Australia	-27.498603	153.015519
University of Reading		Reading	England	United Kingdom	Europe	51.441944	-0.945556
University of Regensburg		Regensburg		Germany	Europe	48.998056	12.095
University of Regina		Regina	Saskatchewan	Canada	North America	50.415553	-104.587953
University of Rhode Island		Kingston	RI	United States	North America	41.48071	-71.5258
University of Rochelle
University of Rochester	101-150	Rochester	NY	United States	North America	43.128333	-77.628333
University of San Diego		San Diego	California	United States	North America	32.771111	-117.1875
University of San Francisco		San Francisco	CA	United States	North America	37.779444	-122.451944
University of Santiago de compostela		Santiago de Compostela		Chile	South America	42.8768	-8.5553
University of Saskatchewan		Saskatoon	Saskatchewan	Canada	North America	52.129722	-106.632778
University of Sheffield	101-150	Sheffield	South Yorkshire	United Kingdom	Europe	53.381389	-1.488272
University of Sherbrooke		Sherbrooke	Quebec	Canada	North America	45.379406	-71.927661
University of South Bohemia		Ceske Budejovice		Czech Republic	Europe	48.978653	14.448417
University of South Carolina		Columbia	SC	United States	North America	33.9975	-81.025278
University of South Carolina Aiken		Aiken	SC	United States	North America	33.573308	-81.768428
University of South Dakota		Vermillion	South Dakota	United States	North America	42.786	-96.9253
University of South Florida		Tampa	FL	United States	North America	28.054561	-82.413058
University of Southampton	76-100	Southampton	England	United Kingdom	Europe	50.93463	-1.39595
University of Southern California	51-75	Los Angeles	CA	United States	North America	34.02051	-118.28563
University of Southern Denmark		Funen		Denmark	Europe	55.368611	10.428056
University of St. Andrews		St. Andrews	Scotland	United Kingdom	Europe	56.3404	-2.7955
University of St. Andrews		St. Andrews	Scotland	United States	North America	56.3404	-2.7955
University of Stirling		Stirling	Scotland	United Kingdom	Europe	56.1455	-3.9195
University of Stockholm		Stockholm		Sweden	Europe	59.365278	18.058333
University of Strathclyde		Glasgow		United Kingdom	Europe	55.861717	-4.2417
University of Sussex		Falmer	England	United Kingdom	Europe	50.865278	-0.085556
University of Sydney	151-200	Sydney		Australia	Australia	-33.865	151.209444
University of Tartu		Tartu		Estonia	Europe	58.381111	26.720278
University of Tasmania	151-200	Hobart		Australia	Australia	-42.904722	147.322778
University of Technology Sydney		Sydney		Australia	Australia	-33.883611	151.200833
University of Tennessee		Knoxville	TN	United States	North America	35.951667	-83.93
University of Texas		Austin	TX	United States	North America	30.285	-97.735
University of Texas Arlington		Arlington	TX	United States	North America	32.731	-97.115
University of Texas Health Science Center	101-150	Houston	TX	United States	North America	29.703251	-95.402871
University of Texas Health Sciences Center	101-150	Houston	TX	United States	North America	29.703251	-95.402871
University of Texas Health Science Center San Antonio	151-200	San Antonio	TX	United States	North America	29.506	-98.576
University of Texas MD Anderson Cancer Center	51-75	Houston	TX	United States	North America	29.707999	-95.397525
University of Texas Southwest Medical Center Dallas	16		Texas	United States	North America	32.812606	-96.83841
University of the Balearic Islands		Palma De Mallorca		Spain	Europe	39.63805	2.64835
University of the Sunshine Coast		Sunshine Coast	Queensland	Australia	Australia	-26.716944	153.062222
University of the West Indies
University of Tokyo	27	Tokyo		Japan	Asia	35.713333	139.762222
University of Toronto	38	Toronto		Canada	North America	43.661667	-79.395
The Hospital for Sick Children and University of Toronto	38	Toronto		Canada	North America	43.661667	-79.395
University of Toronto Scarborough		Scarborough	Ontario	Canada	North America	43.783611	-79.185556
University of Toulouse		Toulouse		France	Europe	43.604444	1.443889
University of Toulouse 3	101-150	Toulouse		France	Europe	43.577702	1.404058
University of Toulouse-Jean Jaures		Toulouse		France	Europe	43.577702	1.404058
University of Tours		Tours		France	Europe	47.35633	0.70312
University of Trier		Trier		Germany	Europe	49.7475	6.687778
University of Tromso		Tromso		Norway	Europe	69.680511	18.973133
University of Tsukuba		Bunkyo-ku	Tokyo	Japan	Asia	36.11143	140.10383
University of Tubingen	76-100	Tubingen		Germany	Europe	48.525	9.059
University of Turku		Turku		Finland	Europe	60.454167	22.284722
University of Tuscia		Viterbo		Italy	Europe	42.4275	12.0927
University of Umea		Umea		Sweden	Europe	63.820556	20.303611
University of Utah	76-100	Salt Lake City	UT	United States	North America	40.765	-111.85
University of Utah School of Medicine		Salt Lake City	UT	United States	North America	40.765	-111.85
University of Utrecht	101-150	Utrecht		Netherlands	Europe	52.083333	5.116667
University of Valladolid		Valladolid		Spain	Europe	41.652222	-4.721389
University of Vermont		Burlington	VT	United States	North America	44.476	-73.195
University of Veterinary Medicine Vienna		Vienna		Austria	Europe	48.255278	16.431389
University of Victoria		Greater Victoria	British Columbia	Canada	North America	48.463325	-123.311751
University of Vienna	151-200	Vienna		Austria	Europe	48.213056	16.359722
University of Vigo		Vigo	Galicia	Spain	Europe	42.1701	-8.6859
University of Virginia	101-150	Charlottesville	Virginia	United States	North America	38.035	-78.505
University of Waikato		Hamilton		New Zealand	Oceania	-37.786944	175.313889
University of Warwick		Coventry	England	United Kingdom	Europe	52.380081	-1.561931
University of Washington	6	Seattle	WA	United States	North America	47.655	-122.308
University of Waterloo		Waterloo	Ontario	Canada	North America	43.468889	-80.54
University of Western Australia	24	Perth		Australia	Australia	-31.980278	115.818611
University of Western Ontario		London	Ontario	Canada	North America	43.008289	-81.271894
University of Western Sydney		Sydney		Australia	Australia	-33.6092	150.754
University of Wisconsin	18	Madison	WI	United States	North America	43.075	-89.417222
University of Wisconsin Madison	18	Madison	WI	United States	North America	43.075	-89.417222
University of Wisconsin Milwaukee		Milwaukee	Wisconsin	United States	North America	43.07503	-87.882915
University of Witwatersrand		Johannesburg		South Africa	Africa	-26.190833	28.030278
University of Wurzburg	151-200	Wurzburg		Germany	Europe	49.788056	9.935278
University of Wyoming		Laramie	WY	United States	North America	41.313056	-105.581389
University of York		York	England	United Kingdom	Europe	53.94659	-1.0525
University of Zurich	25	Zurich		Switzerland	Europe	47.374722	8.548333
University Paris Descartes		Paris		France	Europe	48.851389	2.340556
University Paris est Creteil Val de Marne		Creteil	Ile-de-France	France	Europe	48.788056	2.444167
University Pompeu Fabra		Barcelona		Spain	Europe	41.379167	2.179722
University Public Navarra		Pamplona	Navarre	Spain	Europe	42.800556	-1.636944
University Rennes 1		Rennes	Brittany	France	Europe	48.117976	-1.637993
University Republica		Montevideo		Uruguay	South America	-34.90262	-56.17653
University Res		Bergen		Norway	Europe
University Rey Juan Carlos		Madrid		Spain	Europe	40.5	-3.666667
University Roehampton		Roehampton		United Kingdom	Europe	51.4566	-0.2431
University Roma la Sapienza		Rome		Italy	Europe	41.903333	12.515833
University Roma Tor Vergata		Rome		Italy	Europe	41.853611	12.603333
University Rosario		Rosario	Sante Fe	Argentina	South America	-32.942778	-60.65
University Santiago de Compostela		Santiago de Compostela		Spain	Europe	42.8768	-8.5553
University Sao Paulo	101-150	Sao Paulo		Brazil	South America	23.55	-46.633333
University Stellenbosch		Stellenbosch		South Africa	Africa	-33.930075	18.864725
Uppsala University	151-200	Uppsala		Sweden	Europe	59.8575	17.628889
USDA ARS		Maricopa	Arizona	United States	North America
USDA Forest Service				United States	North America
USDA Forest Service				United States	North America
USDA Forest Service				United States	North America
USDA Forest Service Northern Research Station				United States	North America
USFS Eastern Forest Environmental Threat Assessment Center				United States	North America
USFS Northern Research Station		Irvine	Pennsylvania	United States	North America
USFS Pacific Northwester Research Station		Corvallis	Oregon	United States	North America
USFS Rocky Mountain Research Station				United States	North America
USGS				United States	North America
USGS				United States	North America
USGS				United States	North America
USGS				United States	North America
USGS				United States	North America
USGS				United States	North America
USGS Alaska Science Center				United States	North America
USGS Chanel Islands Field Station		Santa Barbara	CA	United States	North America	34.425833	-119.714167
USGS Northern Prairie Wildlife Research Center		Jamestown	North Dakota	United States	North America	46.905556	-98.703056
USGS Northern Rocky Mountain Science Center		Bozeman	Montana	United States	North America	45.677778	-111.047222
USGS Patuxent Wildlife Research Center		Laurel	Maryland	United States	North America	39.095833	-76.859722
USGS Southern Conte Anadromous Fish Research Center		Turner Falls	Massachusetts	United States	North America	42.598889	-72.556944
USGS Southwest Biological Research Center		Moab	UT	United States	North America	38.5725	-109.549722
USGS Southwest Biological Science Center		Moab	UT	United States	North America	38.5725	-109.549722
USGS Western Ecological Research Center				United States	North America
Utah State University		Logan	UT	United States	North America	41.745	-111.809
Vanderbilt University	51-75	Nashville	Tennessee	United States	North America	36.148649	-86.804972
Howard Hughes Medical Institute and Vanderbilt University School of Medicine	51-75	Nashville	Tennessee	United States	North America	36.148649	-86.804972
Veteran Affairs San Diego Health Care System		San Diego	California	United States	North America
Vetmeduni Vienna		Vienna		Austria	Europe	48.2	16.366667
Victoria Univeristy Wellington		Wellington		New Zealand	Oceania	-41.288889	174.768333
Victoria University of Wellington		Wellington		New Zealand	Oceania	-41.288889	174.768333
Villanova University		Philadelphia	PA	United States	North America	40.03771	-75.33755
Vilnius University		Vilnius		Lithuania	Europe	54.6825	25.287222
Virginia Institute of Marine Science		Gloucester Point	Virginia	United States	North America	37.27	-76.498611
Virginia Polytechni Institute & State University		Blacksburg	Virginia	United States	North America	37.225	-80.425
Virginia Tech		Blacksburg	VA	United States	North America	37.225	-80.425
Vlaams Instituut voor Biotechnologie		Flanders		Belgium	Europe	51.017925	3.694067
Vrije Universiteit	151-200	Amsterdam		Netherlands	Europe	52.333889	4.865
Vrije University	151-200	Amsterdam		Netherlands	Europe	52.333889	4.865
Vrije University Amsterdam	151-200	Amsterdam		Netherlands	Europe	52.333889	4.865
Wageningen University	36	Wageningen		Netherlands	Europe	51.967089	5.658603
Wake Forest University		Winston-Salem	North Carolina	United States	North America	36.135	-80.277
Washington State University		Pullman	WA	United States	North America	46.73	-117.16
Washington University		Saint Louis	MO	United States	North America	38.637	-90.2646
Washington University Medical School		Saint Louis	MO	United States	North America	38.637	-90.2646
Washington University Saint Louis School of Medicine	23	Saint Louis	MO	United States	North America	38.637	-90.2646
Washington University School of Medicine		Saint Louis	MO	United States	North America	38.637	-90.2646
Weizmann Institute	151-200	Rehovot		Israel	Asia	31.9075	34.809167
Weizmann Institute of Science	151-200	Rehovot		Israel	Asia	31.9075	34.809167
Wellcome Trust Centre for Human Genetics		Oxford	England	United Kingdom	Europe	51.752248	-1.215255
Wellcome Trust Genome Campus		Hinxton	England	United Kingdom	Europe	52.083	0.183
Wellcome Trust Sanger Institute		Hinxton	England	United Kingdom	Europe	52.083	0.183
Wellesley College		Wellesley	MA	United States	North America	42.29528	-71.30667
West Virgina University		Morgantown	West Virginia	United States	North America	39.63582	-79.95453
West Virginia University		Morgantown	West Virginia	United States	North America	39.63582	-79.95453
Western Sydney University		Sydney		Australia	Australia	-33.6092	150.754
Western Washington University		Bellingham	WA	United States	North America	48.734	-122.486
Westfalian Wilhelms University		Munster		Germany	Europe	51.964	7.613
Whitman College		Walla Walla	Washington	United States	North America	46.065	-118.330278
Wildlife Conservation Society
Wildlife Institute India
Wissenschaftskolleg zu Berlin		Grunewald		Germany	Europe	52.491389	13.276389
WM Keck Science Department		Claremont	California	United States	North America
Woods Hole Oceanographic Institute		Woods Hole	Massachusetts	United States	North America	41.524517	-70.670972
World Wildlife Fund-US
WSL Institute of Forest Snow and Avalanche Research		Davos		Switzerland	Europe
WSL Swiss Federal Instiute of Snow and Avalanche Research		Davos		Switzerland	Europe
Xiamen University		Xiamen		China	Asia	24.438259	118.093153
Yale University	8	New Haven	CT	United States	North America	41.311111	-72.926667
Yokohama National University		Yokohama	Kanagawa	Japan	Asia	35.444167	139.638056
Yonsei University		Seoul		South Korea	Asia	37.566398	126.938803
Zhejiang University	101-150	Hangzhou	Zhejiang	China	Asia	30.263611	120.120833
Zhejiant University	101-150	Hangzhou	Zhejiang	China	Asia	30.263611	120.120833
Zhongshan University		Guangzhou	Guangdong	China	Asia	23.133333	113.266667
Zoological Forschungsmuseum Alexander Koenig Bonn		Bonn		Germany	Europe
Zoological Society of London		London	England	United Kingdom	Europe	51.5357	-0.1575
		Chandigarh		India	Asia
		Chandigarh		India	Asia
		Delhi		India	Asia
		Delhi		India	Asia
		Montpellier		France	Europe
		Montpellier		France	Europe
		Moulis		France	Europe
		Moulis		France	Europe
		San Diego	California	United States	North America
		San Diego	California	United States	North America
		San Diego	California	United States	North America
		San Diego	California	United States	North America
		Michigan Technology University
		MIT
		MIT
		Montreal Botanical Garden
		MTA Center for Ecological Research
		MTA Center for Ecological Research
		MTA Center for Ecological Research
		MTA Center for Ecological Research
		Tromso
		Trondheim
		Trondheim
		Trondheim
